# Supplementary material
Source: MDPI journal article supplement (https://www.mdpi.com/2073-4395/13/7/1799)
Supplement: s1 [file s1]

Table S1 The data of rice data in Hunan Province in 2019

| Type               | Sown area/10 <sup>3</sup> ha | Yield/(kg ha <sup>-1</sup> ) | Production/t |
|--------------------|------------------------------|------------------------------|--------------|
| Early rice         | 1217.578673                  | 5952.815419                  | 7248021.1    |
| Single-season rice | 1477.631467                  | 7431.479193                  | 10980987.5   |
| Late rice          | 1284.82574                   | 6458.117659                  | 8297555.8    |

Table S2 The data of rice sown area and yield in different cities in 2019

| Cities      | Sown area/10 <sup>3</sup> ha | Yield/(kg ha <sup>-1</sup> ) | Production/t |
|-------------|------------------------------|------------------------------|--------------|
| Changsha    | 289.57                       | 6842.832476                  | 1981479      |
| Chenzhou    | 240.58794                    | 6333.605084                  | 1523789      |
| Shaoyang    | 411.369                      | 6548.940246                  | 2694031      |
| Xiangxi     | 95.7528                      | 6205.969956                  | 594239       |
| Yueyang     | 438.13                       | 6340.966152                  | 2778167.5    |
| Changde     | 496.37                       | 6602.84848                   | 3277455.9    |
| Hengyang    | 465.75063                    | 6704.693024                  | 3122715      |
| Huaihua     | 211.2067                     | 7151.203063                  | 1510382      |
| Loudi       | 180.69                       | 6981.803088                  | 1261542      |
| Xiangtan    | 164.35                       | 7274.77335                   | 1195609      |
| Yiyang      | 339.3552                     | 6494.761241                  | 2204031      |
| Yongzhou    | 379.23                       | 6565.588165                  | 2489868      |
| Zhuzhou     | 211.47921                    | 7281.11761                   | 1539805      |
| Zhangjiajie | 56.1944                      | 6289.790441                  | 353451       |

Table S3 The data of rice sown area and yield with different type in Hunan Province in 2019

| Cities      | Early rice                   |                              |              | Single-season rice           |                              |              | Late rice                    |                              |              |
|-------------|------------------------------|------------------------------|--------------|------------------------------|------------------------------|--------------|------------------------------|------------------------------|--------------|
|             | Sown area/10 <sup>3</sup> ha | Yield/(kg ha <sup>-1</sup> ) | Production/t | Sown area/10 <sup>3</sup> ha | Yield/(kg ha <sup>-1</sup> ) | Production/t | Sown area/10 <sup>3</sup> ha | Yield/(kg ha <sup>-1</sup> ) | Production/t |
| Changsha    | 99.76                        | 5730                         | 571785       | 85.88                        | 7830                         | 673069       | 103.93                       | 7095                         | 736625       |
| Chenzhou    | 68.99027                     | 0                            | 395247       | 99.493                       | 0                            | 686965       | 72.10467                     | 0                            | 441577       |
| Shaoyang    | 119.5319                     | 5520                         | 692024       | 164.2447                     | 8160                         | 1234584      | 127.5924                     | 6705                         | 767423       |
| Xiangxi     |                              | 6000                         |              | 95.7528                      | 7905                         | 594239       |                              | 7680                         |              |
| Yueyang     | 167.08                       | 5295                         | 946278       | 89.01                        | 6420                         | 701344.5     | 182.04                       | 6420                         | 1130545      |
| Changde     | 150.38                       | 0                            | 859405.1     | 187.34                       | 7665                         | 1432524      | 158.65                       | 0                            | 985526.8     |
| Hengyang    | 182.2746                     | 6075                         | 1117163      | 90.46133                     | 8100                         | 714372       | 193.0147                     | 7245                         | 1291180      |
| Huaihua     |                              | 6090                         |              | 211.2067                     | 7890                         | 1510382      |                              | 6945                         |              |
| Loudi       | 54.78                        | 5775                         | 363020       | 67.99                        | 7920                         | 519353       | 57.92                        | 7200                         | 379169       |
| Xiangtan    | 60.7                         | 5250                         | 402905       | 40.46                        | 7680                         | 343081       | 63.19                        | 7050                         | 449623       |
| Yiyang      | 110.7619                     | 5729.025544                  | 637450       | 110.5196                     | 6904.656609                  | 802647       | 118.0737                     | 6124.111246                  | 763934       |
| Yongzhou    | 131.2                        | 5027.49577                   | 777873       | 113.97                       | 6049.496208                  | 886233       | 134.06                       | 6188.229126                  | 825762       |
| Zhuzhou     | 71.04467                     | 4925.677605                  | 479111       | 67.28127                     | 6469.03752                   | 540859       | 73.15327                     | 6478.159522                  | 519835       |
| Zhangjiajie | 1.075333333                  | 5356.478611                  | 5760         | 54.02206667                  | 6318.43654                   | 341335       | 1.097                        | 5793.983592                  | 6356         |
